# Supplementary material for: SPINGO: a rapid species-classifier for microbial amplicon sequences
Source: PubMed Central journal article supplement (PMC4599320; doi:10.1186/s12859-015-0747-1), 2015-10-08

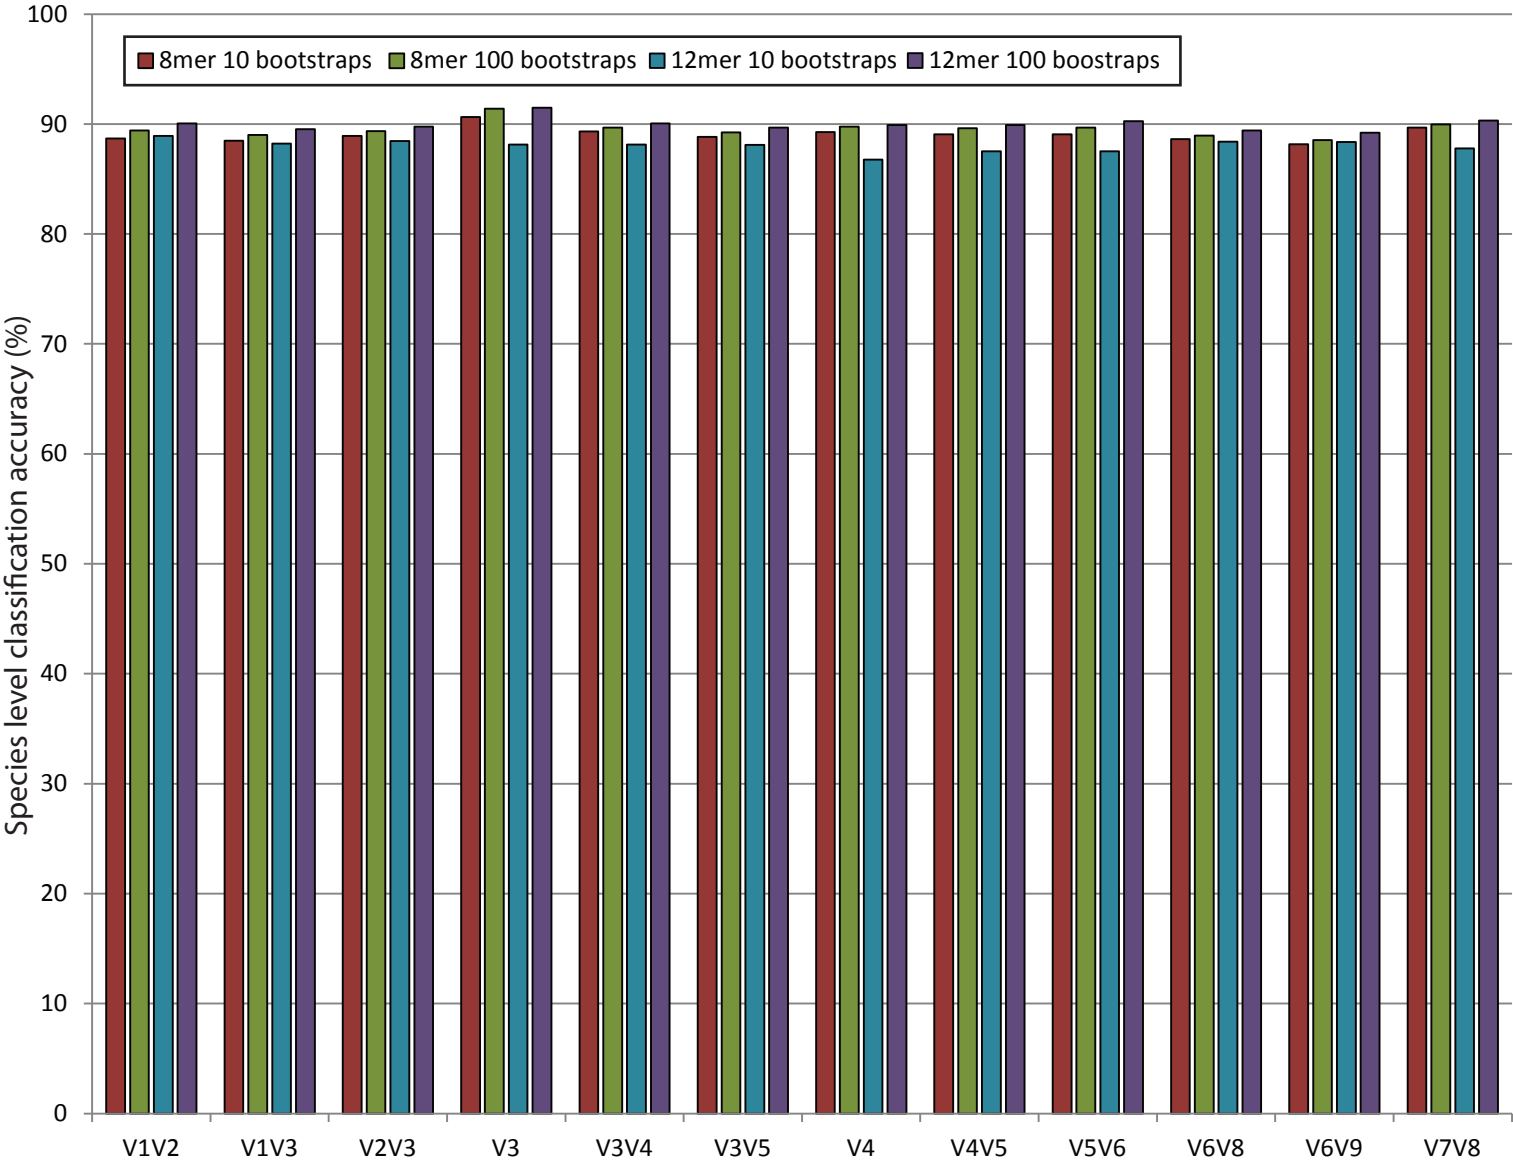

Supplement: 12859_2015_747_MOESM2_ESM.pdf [file 12859_2015_747_MOESM2_ESM.pdf]
